## **A therapeutic combination of two small molecule toxin inhibitors provides pancontinental preclinical efficacy against viper snakebite**

**Authors:** Laura-Oana Albulescu<sup>1</sup>, Chunfang Xie<sup>2,3</sup>, Stuart Ainsworth<sup>1</sup>, Jaffer Alsolaiss<sup>1</sup>, Edouard Crittenden<sup>1</sup>, Charlotte A. Dawson<sup>1</sup>, Rowan Softley<sup>1</sup>, Keirah E. Bartlett<sup>1</sup>, Robert A. Harrison<sup>1,4</sup>, Jeroen Kool<sup>2,3</sup>, Nicholas R. Casewell<sup>1,4,\*</sup>

### **Affiliations:**

<sup>1</sup> Centre for Snakebite Research and Interventions, Liverpool School of Tropical Medicine, Pembroke Place, L3 5QA, Liverpool, UK

<sup>2</sup> Division of BioAnalytical Chemistry, Amsterdam Institute of Molecular and Life Sciences, Vrije Universiteit Amsterdam, De Boelelaan 1085, 1081 HV Amsterdam, The Netherlands

<sup>3</sup> Centre for Analytical Sciences Amsterdam (CASA), The Netherlands

<sup>4</sup> Centre for Drugs and Diagnostics, Liverpool School of Tropical Medicine, Pembroke Place, L3 5QA, Liverpool, UK

\* Corresponding author: [Nicholas.Casewell@lstmed.ac.uk](mailto:Nicholas.Casewell@lstmed.ac.uk)

### **Abstract**

Snakebite is a medical emergency causing high mortality and morbidity in rural tropical communities that typically experience delayed access to unaffordable therapeutics. Viperid snakes are responsible for the majority of envenomings, but extensive interspecific variation in venom composition dictates that different antivenom treatments are used in different parts of the world, resulting in clinical and fiscal snakebite management challenges. Here, we show that a number of repurposed Phase 2-approved small molecules are capable of broadly neutralizing distinct viper venom bioactivities *in vitro* by inhibiting different enzymatic toxin families. Furthermore, using multiple *in vivo* models of envenoming, we demonstrate that a single dose of a rationally-selected dual inhibitor combination consisting of marimastat and varespladib prevents lethality caused by venom from the most medically-important vipers of Africa, South Asia and Central America. Our findings strongly support the translation of

combinations of safe and affordable enzyme inhibitors as novel broad-spectrum therapeutics for snakebite.

## **Introduction**

Snakebite is a Neglected Tropical Disease (NTD) that causes extensive mortality (~138,000/annum) and morbidity (~400,000/annum) in the impoverished rural communities of sub-Saharan Africa, South and Southeast Asia, and Central and South America<sup>1</sup>. Despite annual snakebite deaths equating to one quarter of those that succumb to malaria<sup>2</sup>, this NTD has long been overlooked by the global health community, resulting in little investment in snakebite management, the development of new therapeutics or improving speed of access to treatment. In 2017, snakebite was reclassified as a priority NTD by the World Health Organization (WHO) and, soon after, a global roadmap was published outlining the goal of halving snakebite-related deaths and disabilities by 2030<sup>3</sup>. Key tasks to achieve this goal include those relating to therapeutics, specifically the necessity to improve their safety, efficacy, affordability and accessibility to those in greatest need.

Snake venoms are complex mixtures of numerous proteins and peptides and extensive interspecific variation in venom composition poses major challenges for the development of generic snakebite treatments<sup>4,5</sup>. Current therapies, known as antivenoms, consist of polyclonal immunoglobulins purified from the plasma/serum of large animals (e.g. equines, ovines) hyperimmunized with snake venoms. Because of the specificity of the resulting immunoglobulins towards the toxins present in the venoms used in manufacture, antivenoms typically have limited efficacy against envenoming by different snake species<sup>6</sup>. Consequently, distinct antivenom products are produced (>45 manufacturers worldwide) to treat envenoming by numerous snake species found in different parts of the world, resulting in a highly fragmented drug market, issues with affordability, and a lack of sustainability<sup>7,8</sup>. Other limitations with current antivenom include: (i) poor dose efficacy, as the majority (~80-

90%) of their immunoglobulins do not bind venom toxins<sup>1,9</sup>, (ii) high incidences of adverse reactions due to the administration of large doses of foreign immunoglobulins<sup>10</sup>, (iii) the requirement for intravenous delivery in a hospital setting, and (iv) reliance on cold chain transport and storage. In addition, many rural snakebite victims suffer major delays in accessing healthcare facilities following a bite, if they choose to attend at all, as evidenced by estimates suggesting that 75% of snakebite deaths occur outside of a hospital setting<sup>11</sup>. Cumulatively, these limitations identify an urgent and compelling need to develop cross-generically efficacious, stable and affordable, prehospital treatments as an effective means to considerably decrease snakebite mortality and morbidity<sup>12,13</sup>.

Vipers represent a major group of medically important snakes that are widely distributed across the globe, ranging from the Americas to Africa and Asia, and are responsible for causing the majority of snake envenomings in these regions<sup>14-16</sup>. Treatments for systemic viper envenoming need to neutralize a number of major classes of hemotoxins, which are found in varying abundances across medically important snake species, and typically include the Zn<sup>2+</sup>-dependent snake venom metalloproteinases (SVMPs), phospholipase A<sub>2</sub> (PLA<sub>2</sub>s) and snake venom serine proteases (SVSPs)<sup>17</sup>. Collectively, these three enzymatic families typically comprise >60% of all toxins found in viper venom proteomes<sup>5</sup> and, in combination, are responsible for: (i) the destruction of local tissue, often resulting in necrosis, (ii) the degradation of the basement and cellular membranes resulting in extravasation, and (iii) the onset of coagulopathy via the activation and breakdown of clotting factors – with the latter two effects often culminating in life-threatening systemic hemorrhage<sup>17-20</sup>.

Historically, small molecule toxin inhibitors have received limited attention as potential alternatives to immunoglobulin-based snakebite therapies<sup>12,21-25</sup>, although recent findings have suggested that a number of Phase-2 approved drugs may hold therapeutic promise<sup>23,26-28</sup>. Perhaps the most notable of these is the PLA<sub>2</sub>-inhibitor, varespladib, which has been

widely explored for repurposing as a snakebite therapy, and has shown substantial promise in preclinical models against a number of elapid and viper venoms<sup>22,26,27,29</sup>. In addition, several SVMP-inhibitors have been demonstrated to be capable of abolishing venom-induced hemorrhage or dermonecrosis, including metal ion chelators<sup>21,24,25,28</sup> and peptidomimetic hydroxamate inhibitors<sup>23,24,30</sup>. We recently reported that 2,3-dimercapto-1-propanesulfonic acid (DMPS), a Zn<sup>2+</sup> chelator that is a licensed oral medicine used to treat heavy metal poisoning, was particularly effective in preclinically neutralizing both the local and systemic toxicity of Zn<sup>2+</sup>-dependent SVMP-rich saw-scaled viper venoms (genus *Echis*)<sup>28</sup>. However, despite the great promise of both varespladib and DMPS as orally delivered prehospital therapeutics for snakebite, both are likely to be somewhat restricted in terms of their efficacy, as each predominately targets only one of the handful of major toxin families found in the venoms of medically important snakes.

To address this limitation, and cognisant of the complexity of snake venoms, herein we explored the potential of combinations of small molecule toxin inhibitors as new ‘broad spectrum’ snakebite therapeutics. Our goal - to rationally select and preclinically validate a therapeutic small molecule mixture capable of neutralizing distinct pathogenic toxins found in the venoms of geographically diverse, medically important, hemotoxic vipers - was achieved. Thus, we demonstrate, in a mouse model of envenoming, that a single dose of the SVMP-inhibitor marimastat, combined with the PLA<sub>2</sub>-inhibitor varespladib, provides *in vivo* protection against the lethal effects of envenoming caused by the most medically important vipers of Africa, south Asia and Central America. Our findings hold much promise for the future translation of combinations of small molecule toxin inhibitors into generic prehospital therapies for treating hemotoxic snakebites.

## Results

### *Venom SVMP activities are neutralized by peptidomimetic inhibitors and metal chelators*

SVMPs represent a major class of enzymatic toxins responsible for causing severe snakebite pathology, including hemorrhage, coagulopathy and tissue necrosis<sup>17-19</sup>. Two classes of SVMP-inhibitors have been historically investigated in the field of snakebite: metal chelators and peptidomimetic hydroxamate inhibitors<sup>13</sup>. These different molecules have distinct modes of action; chelators reduce the available pool of Zn<sup>2+</sup> required for SVMP bioactivity, while peptidomimetic hydroxamate inhibitors directly bind the Zn<sup>2+</sup> ion present in the catalytic core of the metalloproteinase<sup>31</sup>. Here, we compared the inhibitory capabilities of the peptidomimetic inhibitors marimastat and batimastat (both Phase 2-approved) and the chelators DMPS and dimercaprol (both licensed drugs) (Fig. S1) against a variety of venoms representing highly medically important viper species from distinct geographical regions<sup>15,32-34</sup> and with variable toxin compositions (Fig. 1); namely the West African and south Asian saw-scaled vipers (*Echis ocellatus* and *Echis carinatus*), the Central American fer-de-lance or terciopelo (*Bothrops asper*), the African puff adder (*Bitis arietans*) and the south Asian Russell's viper (*Daboia russelii*).

We used an *in vitro* kinetic fluorogenic assay<sup>28</sup> to assess the SVMP bioactivity of each venom and its inhibition by varying concentrations of the four SVMP-inhibitors. All venoms exhibited considerable SVMP activity when compared to the PBS control (Fig. 2A), except for *D. russelii*, whose venom SVMP abundance was the lowest (6.9% of all venom proteins; Fig. 1) of the tested species. Marimastat displayed an impressive complete *in vitro* neutralization of SVMP bioactivity of the four active venoms across a 1000-fold drug concentration range (150 nM-150  $\mu$ M) (Fig. 2B). Batimastat displayed equivalent efficacy to marimastat at the two lowest doses (1.5  $\mu$ M and 150 nM, Fig. 2C), but could not be tested at the two higher concentrations due to the low water solubility of this drug and the interference of DMSO (>1%) in our assay. Conversely, dimercaprol was generally effective down to 1.5

$\mu\text{M}$  ( $\text{IC}_{50\text{s}} = 0.02\text{-}0.4 \mu\text{M}$ ), and  $15 \mu\text{M}$  of DMPS was required to fully inhibit SVMP activities ( $\text{IC}_{50\text{s}} = 0.29\text{-}4.19 \mu\text{M}$ ) (Fig. 2B). We therefore concluded that both peptidomimetic inhibitors are equally effective (with  $\text{IC}_{50\text{s}} < 150 \text{ nM}$ ), and that both supersede the preclinically validated metal chelators<sup>28</sup> in neutralizing the *in vitro* SVMP activities of the African, Asian and American snake venoms tested here.

### *Procoagulant venom activities are antagonized by peptidomimetic inhibitors and metal chelators*

Since SVMPs are key toxins associated with causing coagulopathy, we next investigated whether the same peptidomimetic and metal chelating inhibitors could also neutralize the procoagulant bioactivities of viper venoms. To do so, we used a validated kinetic absorbance-based assay monitoring plasma clotting<sup>35</sup> in the presence or absence of venoms and inhibitors (Fig. 3). Consistent with prior studies<sup>36,37</sup>, all of the tested viper venoms displayed net procoagulant activity, with the exception of *B. arietans*, which had no effect on plasma clotting (Fig. 3A). While DMPS was effective at neutralizing the procoagulant activities of *E. ocellatus*, *E. carinatus* and *B. asper* venoms at the highest dose ( $150 \mu\text{M}$ ) (Fig. 3B-D), it was ineffective against *D. russelii* (Fig. 3E). Dimercaprol outperformed DMPS in inhibiting procoagulant activity across all venoms ( $\text{IC}_{50} = < 0.15\text{-}3.7 \mu\text{M}$  vs  $0.8\text{-}25.91 \mu\text{M}$ , respectively), whereas the two peptidomimetic inhibitors were equivalent to (*Echis* spp.) or outperformed (*B. asper* and *D. russelii*) both chelators across the concentration range tested ( $\text{IC}_{50} = < 0.15\text{-}1.92 \mu\text{M}$  for marimastat and  $< 0.15 \mu\text{M}$  for batimastat). Notably, the complete neutralization of SVMP activity in *D. russelii* venom by high doses of marimastat and batimastat revealed clear venom anticoagulant effects (Fig. 3E), which is likely due to the lack of neutralization of anticoagulant venom components, such as  $\text{PLA}_2\text{s}$ <sup>37</sup>.

The results of the SVMP and coagulation assays demonstrated that the peptidomimetic inhibitors outperformed the metal chelators and, although marimastat and batimastat are similar drugs in terms of both mechanism of action and *in vitro* efficacy, marimastat has a number of potential clinical advantages over batimastat, including: (i) increased solubility, (ii) excellent oral bioavailability vs. parenteral administration, and (iii) generally well tolerated vs. some reports of acute bowel toxicity<sup>38</sup>. Therefore, we selected marimastat as our candidate SVMP-inhibitor for use *in vivo* venom-neutralization experiments.

#### *Combinations of inhibitors inhibit distinct pro- and anti-coagulant venom toxins*

The coagulation assay findings described above for *D. russelii* provided a strong rationale for exploring combinations of small molecule toxin inhibitors as snakebite therapeutics. While the SVMP-inhibitors potently inhibited the dominant procoagulant activities of this venom, inhibition revealed a secondary, uninhibited, anticoagulant activity (Fig. 3E). To better understand these effects, we applied a validated nanofractionation approach<sup>35,37</sup> to *D. russelii* venom and reassessed the inhibition of pro- and anti-coagulant bioactivities of the resulting venom fractions (Fig. S1A). Consistent with our findings using whole venom, the resulting nanofractionated bioactivity profiles displayed procoagulant peaks that were effectively inhibited in a dose-dependent manner by marimastat, while fractions with anticoagulant activity were not neutralized by this inhibitor at any of the tested concentrations (Fig. S2A).

Prior research suggests that the anticoagulant activity of *D. russelii* venom is mediated by PLA<sub>2</sub> toxins<sup>37</sup>. Indeed, of the toxins found in *D. russelii* venom, 35% are PLA<sub>2</sub>s, while only 16% are SVSPs and 6.9% SVMPs<sup>5</sup> (Fig. 1). Consequently, we tested the well-established PLA<sub>2</sub>-inhibitor varespladib (Fig. S1) against the same venom fractions. As anticipated, we found that varespladib effectively inhibited the anticoagulant activity of *D. russelii* venom (Fig. S2A) and, surprisingly, also exhibited some inhibitory effect against procoagulant

venom toxins, but only at very high doses (20  $\mu$ M), suggesting perhaps a non-specific effect (Fig. S2A).

Since marimastat effectively neutralizes the SVMP-driven procoagulant activity of *D. russelii* venom, while varespladib inhibits the anticoagulant PLA<sub>2</sub> toxins, we next tested whether a combination of these two drugs could restore normal clotting caused by the whole venom. At the two highest doses tested (15  $\mu$ M and 150  $\mu$ M), the combination of these two inhibitors restored clotting profiles to levels similar to those observed in the control (Fig. S2B), demonstrating that a rationally designed small molecule toxin inhibitor mix is capable of simultaneously inhibiting both procoagulant and anticoagulant venom toxins.

#### *Venom SVSP activities are abrogated by the serine protease-inhibitor nafamostat*

While inhibitors against SVMP and PLA<sub>2</sub> toxins have been actively researched, to our knowledge no serine protease-inhibitors have been investigated as drugs against snakebite. We selected nafamostat (Fig. S1), a serine protease-inhibitor licensed as an anticoagulant medicine in Japan<sup>39</sup>, as a candidate SVSP-inhibitor and tested its *in vitro* efficacy using a chromogenic assay. Among the tested venoms, all except *D. russelii* displayed detectable SVSP activity (Fig. 4A). These activities were broadly neutralized in a dose-dependent manner by nafamostat (Fig. 4B), with the highest doses (150 and 15  $\mu$ M) completely inhibiting SVSP activity, irrespective of venom ( $IC_{50s}$  = 0.12-1.07  $\mu$ M). Although SVSP toxins can also perturb coagulation, we were unable to test the efficacy of nafamostat in the plasma assay described above due to nafamostat's inherent anticoagulant potency (Fig. S3), which is mediated via interactions with cognate serine proteases found in the blood clotting cascade, such as thrombin and factors Xa and XIIa<sup>40</sup>. Because of these off-target interactions, generic SVSP-inhibitors must be carefully evaluated prior to any inclusion in a human snakebite therapy, especially since SVSPs are often less abundant in venom than SVMP or



PLA<sub>2</sub> toxins<sup>5</sup> (Fig. 1). Nevertheless, the *in vitro* efficacy of nafamostat demonstrated here justified its evaluation in *in vivo* models of envenoming to select the most efficacious mixture of inhibitors.

#### *Preclinical efficacy of small molecule toxin inhibitors as solo and combination therapies*

We used an established *in vivo* model of envenoming<sup>41,42</sup> to test the efficacy of small molecule toxin inhibitors. This model consists of the preincubation of the test therapy with venom, followed by intravenous injection of the mixture into groups of five male CD-1 mice (18-20 g) via the tail vein, and is based on the gold standard method of preclinical efficacy recommended by the World Health Organization<sup>43</sup>. We first tested the ability of marimastat, varespladib and nafamostat as solo therapies to prevent venom-induced lethality in mice challenged with a 2.5 x median lethal dose (LD<sub>50</sub>) of *E. ocellatus* venom (45 µg)<sup>25</sup>. We selected this snake venom and venom dose as our initial model based upon its medical importance and results from our recent work exploring the preclinical venom-neutralizing efficacy of metal chelators<sup>28</sup>. All five of the experimental animals receiving only *E. ocellatus* venom succumbed to the lethal effects within 50 mins. Both the PLA<sub>2</sub>-inhibitor varespladib and the SVMP-inhibitor marimastat (60 µg inhibitor/mouse) prolonged the survival of experimentally envenomed animals (Fig. 5A). However, marimastat conferred substantially greater protection than varespladib, as only one experimental animal succumbed towards the end of the experimental time frame of 6 h (death at 216 min), and the remaining four survived (Fig. 5A), while treatment with varespladib resulted in two early deaths (5 and 9 min) and three later deaths (67, 210 and 341 min vs. <50 min for the venom-only control) (Fig. 5A). Conversely, the administration of the SVSP-inhibitor nafamostat (60 µg inhibitor/mouse) resulted in no evident efficacy, with negligible differences in survival times compared with the venom-only control (mean survival of 27.4 vs 17.8 min, respectively). Inhibitor-only

controls revealed no obvious signs of acute toxicity of any of the drugs, as experimental animals survived without ill effects and exhibited normal behaviors throughout the 6 h treatment period.

We next tested the preclinical efficacy of two different inhibitor combinations against the lethal effects of *E. ocellatus* venom; (i) a dual mixture consisting of marimastat and varespladib (MV, 60 µg each) and (ii) a triple mixture containing marimastat, varespladib and nafamostat (MVN, 60 µg each). Both toxin inhibitor mixtures resulted in full survival of all experimental animals until the end of the experiment (Fig. 5B), demonstrating that the combination of small molecules results in increases in efficacy, in line with our *in vitro* coagulation findings.

We next assessed markers of venom-induced coagulopathy in the envenomed animals via the quantification of thrombin-antithrombin (TAT) levels, a proxy for thrombin generation, in plasma collected following euthanasia. In line with previous reports<sup>25,28</sup>, TAT levels correlated well with treatment efficacy. While animals in the venom-only group displayed very high TAT levels (mean of 1127.3 ng/ml), those receiving the MV and MVN inhibitor combinations exhibited substantially lower levels (162.0-203.9 and 238.1-255.5 ng/ml), and closer to those found in normal mice (i.e. no venom or treatment) controls (10.2-15.9 ng/ml) (Fig. 5C). TAT levels in the marimastat solo therapy group were also reduced (231.2-267.9 ng/ml) and comparable with the two combination therapies, but those detected in the less efficacious varespladib- and nafamostat-only treatment groups displayed substantially higher TAT levels (472.7-649.9 ng/ml and 543.9-859.1 ng/ml, respectively), although these remain lower than those of the venom-only controls. In combination, these findings suggest that marimastat is likely responsible for much of the observed efficacy against the lethal effects of *E. ocellatus* venom, but that small molecule combinations with additional toxin inhibitors provide superior preclinical efficacy than treatment with marimastat alone.

### *Inhibitor mixes protect against lethality caused by a diverse range of viper venoms*

We next investigated whether the two inhibitor combination therapies were equally effective against the other viper venoms tested *in vitro*, as these venoms exhibit highly variable toxin compositions in comparison with the SVMP-rich toxin profile of *E. ocellatus* (Fig. 1). We adopted the same approach as described above, and intravenously challenged groups of experimental animals with  $2.5 \times LD_{50}$  doses of *E. carinatus* ( $47.5 \mu\text{g}$ )<sup>41</sup>, *B. asper* ( $47 \mu\text{g}$ )<sup>44</sup>, *B. arietans* ( $54 \mu\text{g}$ )<sup>41</sup> and *D. russelii* ( $20 \mu\text{g}$ )<sup>45</sup> venoms in the presence and absence of the MV and MVN therapeutic mixtures.

In a remarkable demonstration of the therapeutic potential of small molecule inhibitors, and despite extensive venom differences, we found that the dual mixture of marimastat and varespladib protected mice from the lethal effects of all four venoms for the duration of the experiment (Fig. 5D-G). The triple mixture, additionally containing nafamostat, proved equally effective across the venoms, with the exception of one early death (31 min) in the group dosed with *D. russelii* venom (Fig. 5D-G). TAT levels increased in all venom-only groups (Fig. 5H), although these increases were negligible in those receiving *B. arietans* venom – a finding in line with our *in vitro* data suggesting that this venom has little coagulopathic activity (Fig. 3A). TAT levels were consistently reduced in the experimental animals treated with the two inhibitor mixtures, resulting in 53.6-95.5% reductions compared with the various venom-only groups (Fig. 5H).

Comparable preclinical efficacy between the MV and MVN inhibitor combinations against a variety of medically important viper venoms suggests that the SVSP-inhibitor nafamostat does not contribute substantially to venom neutralization. Because (i) SVSP-inhibitors such as nafamostat can induce off-target effects by interacting with serine proteases found in the coagulation cascade, (ii) the inclusion of every additional molecule in an inhibitory

therapeutic combination substantially increases regulatory hurdles for future translation, and (iii) the inhibition of SVMP and PLA<sub>2</sub> toxins appears sufficient to protect against lethality caused by a diverse array of viper venoms, we decided to proceed with the marimastat and varespladib combination as our lead candidate for testing in more therapeutically challenging preclinical models of envenoming.

*Administration of the marimastat and varespladib (MV) dual therapy after venom challenge broadly protects against venom lethality*

To better mimic a real-life envenoming scenario, we next tested the marimastat and varespladib inhibitor mixture in a preclinical ‘challenge then treat’ model of envenoming, where the venom is first administered intraperitoneally and then the test therapy is administered intraperitoneally separately after the venom challenge<sup>28</sup>. To this end, we injected venom from each of the five viper species in doses equivalent to at least 5 x the intravenous (iv) LD<sub>50</sub> dose followed, 15 mins later, by a single dose of the inhibitor mixture (120 µg of both marimastat and varespladib). Experimental animals were then monitored for 24 h. For *E. ocellatus*, *E. carinatus* and *B. arietans* venoms we challenged mice with 5 × iv. LD<sub>50</sub> doses (90 µg, 95 µg and 108 µg, respectively), while higher venom doses were required for *B. asper* (303 µg, equivalent to ~16 × iv LD<sub>50</sub> or 3 × ip LD<sub>50</sub><sup>46</sup>) and *D. russelii* (13 × iv LD<sub>50</sub>, 105 µg) to ensure mortality occurred within 7 h, thus leaving a 17 h window for measuring prolonged survival in the treatment groups.

All of the venom-only groups succumbed to the lethal effects of envenoming within 4 h, with the exception of two mice receiving *D. russelii* venom (deaths at ~7 h), while experimental animals dosed with only the inhibitor combination (i.e. treatment control) survived the duration of the experiment (24 h) with no apparent adverse effects (Fig. 6A-E). Across all of

the diverse venoms tested, the delayed administration of a single dose of the marimastat and varespladib combination resulted in extensive, prolonged, survival for at least 17 h after the venom-only controls suffered venom-induced lethality (Fig. 6A-E). Remarkably, all animals receiving the delayed treatment survived for the full duration of the experiment (24 h) irrespective of the venom used as challenge, with the sole exception of one mouse receiving *E. carinatus* venom, for which survival was still prolonged by at least 18 h when compared to the venom-only control (death registered at 21.3 h) (Fig. 6B).

Quantified TAT levels from the envenomed animals correlated with survival, with those receiving the inhibitor mixture exhibiting 78.5-90.5% reductions compared to the elevated levels of the various venom-only controls (Fig. 6F). Contrastingly, quantification of soluble thrombomodulin, a marker of endothelial cell damage, was only elevated in *B. asper* ‘envenomed’ mice. This observation was noted for both the ‘intravenous preincubation’ and ‘intraperitoneal challenge then treat’ models of envenoming (Fig. S4A and B). These elevated levels were reduced to control levels in experimental animals treated with the inhibitor combination in both experimental approaches (Fig. S4C). These findings suggest that, in addition to protecting against the lethal effects of the various viper venoms, the marimastat and varespladib therapeutic combination is capable of preventing coagulopathy, and in the case of *B. asper*, inhibiting toxins acting to disrupt the endothelium.

## Discussion

Snakebite is the world’s most lethal NTD, resulting in ~138,000 deaths annually and primarily affecting the world’s resource-poor populations of the tropics and subtropics<sup>1</sup>. Although conventional polyclonal immunoglobulin-based antivenoms save thousands of lives each year, their lack of specificity, poor cross-species efficacy, reliance on delivery in clinical settings and low affordability severely hamper their accessibility and utility for treating

tropical snakebite victims<sup>1,42</sup>. Consequently, new strategies capable of circumventing variation in snake venom composition to deliver broad neutralization across snake species, while simultaneously improving the safety, affordability and storage logistics of treatment, are urgently needed<sup>3,47</sup>. Approaches showing signs of promise include the rational design of immunogens to improve the neutralizing breadth of conventional products<sup>48</sup>, the selection of human or humanized toxin-specific monoclonal or oligoclonal antibodies<sup>49,50</sup>, and the use of small molecule inhibitors specific to certain toxin families<sup>12</sup>, such as the PLA<sub>2</sub>-inhibitor varespladib<sup>22,26,27</sup> and the metal chelator DMPS<sup>28</sup>. Small molecule toxin inhibitors offer a number of desirable characteristics over existing snakebite therapies, including desirable specificity, potent dose-efficacy, higher tolerability, greater stability and superior affordability<sup>12</sup>. These characteristics, combined with their oral formulation, provide an opportunity to provide prehospital treatment for snakebite, thereby circumventing one of the major challenges faced by impoverished snakebite victims, who have great difficulty in rapidly accessing the secondary and tertiary healthcare facilities where current treatments are held. Here, we show that a small molecule mixture consisting of the inhibitors marimastat and varespladib, which are directed against the hemotoxicity-inducing SVMP and PLA<sub>2</sub> toxin families, provides extensive preclinical protection against lethality caused by a geographically diverse array of medically important viper venoms that differ considerably in their toxin compositions.

Due to their importance in many snake venoms, we first rationally selected an inhibitory molecule capable of abrogating the activity of SVMP toxins. *In vitro* SVMP and coagulation assays convincingly demonstrated that the Phase 2-approved peptidomimetic hydroxamate inhibitors batimastat and marimastat provided superior venom neutralization over the metal chelators DMPS and dimercaprol (Figs. 2 and 3). Despite previous reports of batimastat exhibiting increased efficacy over marimastat in preventing venom-induced local

hemorrhage<sup>23</sup>, we found both drugs to be equipotent *in vitro*. We selected marimastat as our candidate for *in vivo* efficacy experiments due to a number of desirable characteristics that make it amenable for a future field intervention for snakebite, specifically its oral vs. intraperitoneal route of administration, and its increased solubility and tolerability compared to batimastat<sup>38</sup>. Indeed, these characteristics seemingly contributed to the demise of batimastat during development, although both drugs were ultimately discontinued following lack of efficacy in Phase 3 clinical trials<sup>38</sup>, despite showing early promise as cancer therapeutics<sup>51</sup>. Marimastat displays particularly good oral bioavailability. It can be detected in the blood of patients within 15-60 min after ingestion, reaches peak plasma concentrations 1.5-3 h post-administration with a half-life of 8-10 h<sup>52</sup>, and can be detected in the circulation when given at doses >200 mg for up to 2 days<sup>52</sup>. Furthermore, marimastat is well tolerated, with no notable side effects observed with single doses of up to 800 mg or bidaily doses of 200 mg for 6.5 days<sup>52</sup>, or when 75 mg doses were administered daily for 28 days in patients with advanced pancreatic cancer<sup>53</sup>. In our study, we used a low dose of 3 µg/g or 6 µg/g for the intravenous and intraperitoneal murine models of envenoming respectively, which translates to 0.24 mg/kg and 0.48 mg/kg when applying animal to human dose conversion<sup>54</sup>. Even when considering the differences in route of administration (intravenous/intraperitoneal vs. oral), our extrapolated dose (33.6 mg per 70 kg adult) is very low compared to that well-tolerated in Phase 1 trials (800 mg) and this, combined with the relatively high oral bioavailability of marimastat (70%), offers substantial scope for the development of this drug as a prehospital therapeutic for use soon after a snakebite.

The second drug in our mixture, varespladib, is a secretory PLA<sub>2</sub>-inhibitor previously investigated for use in the treatment of various acute coronary syndromes<sup>55</sup>. Both varespladib and varespladib methyl (its oral prodrug, which is rapidly converted *in vivo* to varespladib) have been used clinically in Phase 1 and 2 trials<sup>55-57</sup>, although a lack of efficacy at Phase 3

ultimately resulted in its discontinuation<sup>58</sup>. More recently, varespladib has been explored for re-purposing as a potential therapeutic for the treatment of snakebite. Both varespladib and its oral prodrug have been shown to exhibit promising neutralizing capabilities against a variety of different snake venoms<sup>22,29</sup>, but have proven to be particularly effective at mitigating the life-threatening effects of neurotoxicity caused by certain elapid venoms in animal models of envenoming<sup>26,27,59</sup>. Similar to marimastat, varespladib shows good oral bioavailability, and has a half-life equating to 5 hr when delivered by iv infusion<sup>55</sup>. Varespladib has also been demonstrated to be well tolerated at Phase 1 and 2<sup>55</sup>, although a double-blind randomized Phase 3 clinical trial showed that acute coronary syndrome patients receiving 500 mg of oral varespladib daily had a greater risk of myocardial infarction than those receiving placebo<sup>58</sup>, despite the same daily dose used in Phase 2B (>300 patients for >6 months) resulting in no greater risk of major adverse cardiovascular events<sup>56</sup>. Given that the dose of varespladib used in these clinical studies is ~15-fold higher than the human equivalent dose used intraperitoneally in our animal model (0.48 mg/kg, 33.6 mg per 70 kg adult), there appears to be considerable space to safely optimize the dose and dosing frequency of varespladib in future studies to establish an appropriate therapeutic regimen for use for treating snakebite.

Our *in vivo* venom neutralization studies convincingly demonstrate that a combination of these SVMP- and PLA<sub>2</sub>-inhibiting drugs is capable of counteracting the lethal hemorrhagic, coagulopathic and/or hemostasis-disrupting effects of a variety of venoms sourced from the most medically important vipers of Central America, sub-Saharan African and South Asia<sup>15,32-34</sup> (Figs. 5 and 6). The addition of the serine protease-inhibitor nafamostat to the therapeutic mixture resulted in no additional protection to the marimastat and varespladib dual combination (Fig. 5) despite SVSP toxins also being common pathogenic constituents of many viper venoms<sup>5</sup>, and this drug exhibiting potent inhibition of SVSP toxins *in vitro* (Fig. 4). These findings, alongside evidence that nafamostat provides no protection against the



lethal effects of *E. ocellatus* venom when used as a solo therapy (Fig. 5A), strongly suggest that nafamostat does not appear to substantially contribute to the observed preclinical efficacy (Fig. 5). Despite being a licensed anticoagulant drug in Japan since the early 1990s<sup>39</sup>, nafamostat has potential detrimental off-target effects for use in snake envenoming via interaction with cognate coagulation cascade serine proteases<sup>40</sup>, has a short half-life (~8 min)<sup>60</sup>, and requires intravenous administration, thereby limiting its utility and applicability as a potential prehospital snakebite therapeutic. For those various reasons, our lead candidate therapeutic mixture remained restricted to the marimastat and varespladib combination.

The administration of the marimastat and varespladib combination 15 mins after ‘envenoming’ resulted in the survival of experimental animals for at least 17 h after mortality was observed in the venom-only control groups (Fig. 6). In our previous work, we demonstrated that the licensed metal chelator DMPS, which shows much promise as an early intervention therapeutic against snakes with SVMP-rich venoms (e.g. the West African saw-scaled viper, *E. ocellatus*)<sup>28</sup>, prevented lethality for ~8 h in the same preclinical model, but required a later dose of antivenom (1 hr after venom delivery) to extend protection to a comparable duration to that observed here with the marimastat and varespladib combination (Fig. S5). While DMPS undoubtedly represents a highly promising future therapeutic for snakebite, not least because of its oral formulation, licensed drug status and decades of therapeutic use for other indications<sup>61,62</sup>, it seems unlikely to be highly efficacious as a solo therapy against a wide variety of snakes due to only targeting SVMP toxins<sup>28</sup>. Contrastingly, the combination of marimastat and varespladib reported here provided consistent and prolonged preclinical protection against lethality caused by a wide diversity of medically important vipers despite, for example, the south Asian Russell’s viper (*D. russelii*) having substantially different abundances of distinct venom toxins to that of *E. ocellatus*<sup>4,63–65</sup> (Fig. 1). Given that all existing antivenoms are geographically-restricted in terms of their snake

species efficacy (e.g. restricted to specific continents or countries within), and require considerably higher doses to be preclinically effective (e.g. 166.66  $\mu\text{g}$  of monospecific antivenom antibodies<sup>25</sup> vs 1.33  $\mu\text{g}$  of each inhibitor per 1  $\mu\text{g}$  of venom challenge for *E. ocellatus*, for example), these findings suggest that this therapeutic combination of small molecule toxin inhibitors may represent a highly specific yet generic treatment for viperid snakebite.

Notwithstanding the clear and exciting snakebite therapeutic promise of this small molecule toxin inhibitor combination, future research is required to facilitate its translation. Additional preclinical studies are needed to explore the neutralizing efficacy of this combination in oral dosing regimens, including repeat dosing experiments combined with pharmacokinetic analyses, to model the oral dose required to maintain effective concentrations of the drugs sufficient to provide prolonged protection from envenoming. While no overt adverse reactions were observed in the experimental animals used in this study, and both marimastat and varespladib have previously been demonstrated to be well tolerated clinically<sup>52,53,57,66</sup>, potential drug-drug interactions also need to be robustly assessed. Finally, the considerable *in vitro* and *in vivo* venom neutralization data presented here should be extended to additional medically important snake species, and the efficacy of this combination therapy against the local, morbidity-inducing, effects of snake venoms should also be explored.

Herein we have demonstrated the combination of two Phase 2-approved drugs, marimastat and varespladib, provide unparalleled pancontinental protection against venom-induced lethality in both a conventional ‘preincubation’ model of envenoming, and a far more challenging preclinical model consisting of delayed drug delivery post-envenoming. While these findings hold much promise, we propose that the future translation of this inhibitor combination should occur in parallel with other small molecule toxin inhibitor lead

candidates, such as DMPS and varespladib<sup>26–28,59</sup>, to increase the breadth of new molecules being added to the snakebite treatment toolbox and, most importantly, to help offset the risk of potential drug failures during clinical trials. Ultimately, our data strongly advocates for the future translation of combinations of small molecule toxin inhibitors as generic, prehospital treatments to substantially reduce the life-threatening and life-changing consequences of the world's most lethal neglected tropical disease - snakebite.

## Methods

### *Venoms*

Venoms were sourced from either wild-caught specimens maintained in, or historical venom samples stored in, the Herpetarium of the Liverpool School of Tropical Medicine. This facility and its protocols for the expert husbandry of snakes are approved and inspected by the UK Home Office and the LSTM and University of Liverpool Animal Welfare and Ethical Review Boards. The venom pools were from vipers with diverse geographical localities, namely: *E. ocellatus* (Nigeria), *E. carinatus sochureki* (India, referred to throughout as *E. carinatus*), *B. arietans* (Nigeria), *B. asper* (Atlantic coast of Costa Rica) and *D. russelii* (Sri Lanka). Note that the Indian *E. carinatus* venom was collected from a single specimen that was inadvertently imported to the UK via a boat shipment of stone, and then rehoused at LSTM on the request of the UK Royal Society for the Prevention of Cruelty to Animals (RSPCA). Crude venoms were lyophilized and stored at 4 °C to ensure long term stability. Prior to use, venoms were resuspended to 10 mg/ml in PBS (pH 7.4) and then further diluted to 1 mg/ml stock solutions (with PBS) for the described experiments.

### *Inhibitors*

Dimercaprol (2,3-dimercapto-1-propanol  $\geq 98$  % iodometric, Cat no:64046-10 ml), marimastat ( $\geq 98$  % HPLC M2699-5MG), batimastat (SML0041-5MG) and varespladib ( $\geq 98$  % HPLC SML1100-5MG) were purchased from Sigma-Aldrich. Nafamostat mesylate (ab141432 10 mg) was purchased from Abcam and DMPS (2,3-dimercapto-1-propanesulfonic acid sodium salt monohydrate, 95%, Cat no: H56578) from Alfa Aesar. Working stocks (tenfold dilutions from 2 mM to 2  $\mu$ M) were made using deionized water, with the exception of varespladib and batimastat, for which we used DMSO due to water insolubility.

### *Enzymatic assays*

The SVMP assay measuring metalloproteinase activity and the plasma assay measuring coagulation in the presence or absence of venoms and inhibitors were performed as previously described<sup>28</sup>. The SVMP assay kinetically measured cleavage of a quenched fluorogenic substrate (ES010, R&D Biosystems) by venom in the presence or absence of inhibitors. Briefly,

10  $\mu$ l of the substrate (supplied as a 6.2 mM stock) was used per 5 ml reaction buffer (150 mM NaCl, 50 mM Tris-Cl pH 7.5). Reactions consisted of 10  $\mu$ l of venom  $\pm$  inhibitors in PBS and 90  $\mu$ l of substrate. Venoms were used at 1  $\mu$ g/reaction and final inhibitor concentrations ranged from 150  $\mu$ M to 150 nM. Samples were preincubated for 30 min at 37  $^{\circ}$ C and pipetted in triplicate into 384-well plates (Greiner). Thereafter, data was collected on an Omega FLUOstar (BMG Labtech) instrument at an excitation wavelength of 320 nm and emission wavelength of 405 nm at 25  $^{\circ}$ C for 1 h. The areas under the curve (AUCs) in the 0-40 min interval were calculated for each sample; this time point was chosen as the time where all fluorescence curves had reached a plateau (maximum fluorescence). For comparing venom-only samples, the means of at least three independent experimental runs for each

condition, expressed as AUCs ( $n \geq 3$ ), were plotted at each inhibitor concentration with standard error of the mean (SEM). To determine inhibitor efficacy, the AUCs for each of the samples that consisted of venom + inhibitors were transformed and expressed as percentages of the venom-only sample (where the venom was 100%). The negative control (PBS only) was also expressed relative to the venom, and the variation in background was presented as an interval delineated by the lowest and highest values in the PBS-only samples across concentrations and inhibitors for a specific venom. Due to the sensitivity of the assay to DMSO concentrations above 1% in the final reaction, the 2 mM stock of batimastat was further diluted in reaction buffer to obtain 200  $\mu\text{M}$ , 20  $\mu\text{M}$  and 2  $\mu\text{M}$  stocks, alongside appropriate DMSO only controls. However, only the latter two concentrations were sufficiently depleted of DMSO for viable use in the assay.

We used a previously developed plasma clotting assay<sup>35</sup> to measure venom-induced coagulation. Briefly, 100 ng of each venom was incubated at 37 °C for 30 min in the presence or absence of inhibitors (150  $\mu\text{M}$  to 150 nM final concentrations). The final reaction consisted of 10  $\mu\text{l}$  venom  $\pm$  inhibitors in PBS, 20  $\mu\text{l}$  20 mM  $\text{CaCl}_2$ , and 20  $\mu\text{l}$  citrated bovine plasma (VWR). The samples were pipetted in triplicate into 384-well plates, and absorbance monitored at 595 nm for 2 h at 25 °C on an Omega FLUOstar instrument. We calculated the maximum clotting velocity of each of the curves as per clot waveform analysis<sup>67</sup>, by calculating the maximum of the first derivative. The means of at least three independent experimental runs for each condition were plotted at each inhibitor concentration with SEMs. SVSP activity was measured using a chromogenic substrate (S-2288, Cambridge Bioscience). Reactions consisted of 15  $\mu\text{l}$  of venom  $\pm$  inhibitors in PBS, 15  $\mu\text{l}$  of assay buffer (100 mM Tris-Cl pH 8.5, 100 mM NaCl) and 15  $\mu\text{l}$  of 6 mM substrate. A positive venom-only control, a negative control containing 15  $\mu\text{l}$  of PBS and a drug-only control (where applicable) were also included. The final substrate concentration was 2 mM and venoms were used at 1

$\mu\text{g}/\text{reaction}$ . When testing inhibitors, these were preincubated with the venoms for 30 min at 37 °C with concentrations ranging from 150  $\mu\text{M}$  to 150 nM (tenfold dilutions). The samples were pipetted in triplicate into 384-well plates (Greiner) and absorbance at 405 nm was monitored kinetically for ~30 min on an Omega FLUOstar instrument (BMG Labtech). Given the linearity of the resulting slopes, negative control readings (PBS) were subtracted from each reading and the rate of substrate consumption calculated by measuring the slope between 0 and 5 mins. The mean rates (expressed as  $\Delta\text{Abs}/\text{time}/\mu\text{g}$  venom) of at least three independent experimental runs for each condition ( $n \geq 3$ ) were plotted at each inhibitor concentration with SEMs.

#### *Nanofractionation experiments*

Fifty microlitres of venom solution (*D. russelii*; 1 mg/ml) was injected into a Shimadzu LC-2010 system with nanofractionation in parallel. Separation was performed on a Waters XBridge reversed-phase C18 column (250  $\times$  4.6 mm column with 3.5  $\mu\text{m}$  pore-size) at 30 °C. The total flow rate of the mobile phase solution was 0.5 ml/min with eluent A (98% H<sub>2</sub>O, 2% acetonitrile [ACN], 0.1% formic acid [FA]) and eluent B (98% ACN, 2% H<sub>2</sub>O, 0.1% FA). Liquid chromatography gradients consisted of a linear increase of mobile phase B from 0 to 50% in 20 min, followed by a linear increase to 90% B in 4 min, then isocratic at 90% B for 5 min, after which the percentage of mobile phase B was decreased from 90% to 0% in 1 min, followed by 10 min at 0% B to re-equilibrate. The effluent was split in a 1:9 ratio of which the 10% fraction was sent to a Shimadzu SPD-M20A prominence diode array detector and the 90% fraction was directed to a nanofractionation collector which dispensed the fractions into transparent 384-well plates (F-bottom, rounded square well, polystyrene, without lid, clear, non-sterile; Greiner Bio One, Alphen aan den Rijn, The Netherlands) at a resolution of 6 s/well. The collector used was either a commercially available FractioMate™

nanofractionator (SPARK-Holland & VU, Netherlands, Emmen & Amsterdam) controlled by FractioMator software (Spark-Holland, The Netherlands, Emmen) or a modified Gilson 235P autosampler controlled by in-house written software Ariadne. The well plates with venom fractions were then dried overnight in a Christ Rotational Vacuum Concentrator (RVC 2–33 CD plus, Zalm en Kipp, Breukelen, The Netherlands) equipped with a cooling trap, and maintained at -80 °C during operation. The freeze-dried plates were then stored at -80 °C prior to bioassaying.

Neutralization of coagulopathic venom toxins by marimastat and varespladib was assessed by assaying the *D. russelii* venom nanofractionated plates in the plasma coagulation assay, as recently described<sup>35</sup>. To each well of the nanofractionated well plate, 10 µl of inhibitor solution (e.g. marimastat or varespladib in PBS, or PBS-only control) was pipetted by a VWR Multichannel Electronic Pipet, followed by brief low-speed collection of samples via centrifugation (e.g. 1 min at 2,000 rpm). The final assay concentrations of the inhibitors tested in the assay were 20 µM, 4 µM, 0.8 µM, 0.16 µM, 0.032 µM and 0.0064 µM. The plates were then incubated for 30 min at room temperature, and during this time bovine plasma (Sterile Filtered, Biowest, Nuaille, France) was defoamed in a water bath and centrifuged (4 min at 2,000 rpm) prior to use. Following incubation, 20 µl CaCl<sub>2</sub> solution (20 mM), followed by 20 µl plasma (with instrument rinsing in between with Milli-Q water), were pipetted into each well on the plate using a Multidrop™ 384 Reagent Dispenser (Thermo Fisher Scientific, Ermelo, The Netherlands). The plate was then read immediately for absorbance kinetically for 100 min at 595 nm at 25 °C using a Varioskan™ Flash Multimode Reader (Thermo Fisher Scientific, Ermelo, The Netherlands). The obtained results were normalized by dividing the slope measured in each well by the median of all slope values across the plate, and the processed coagulation chromatograms were plotted to

visualize very fast coagulation, medium increased coagulation and anticoagulation, as previously described<sup>37</sup>.

#### *In vivo experimentation*

All animal experiments were conducted using protocols approved by the Animal Welfare and Ethical Review Boards of the Liverpool School of Tropical Medicine and the University of Liverpool, and performed in specific pathogen-free conditions under licensed approval (PPL #4003718 and #P5846F90) of the UK Home Office and in accordance with the Animal [Scientific Procedures] Act 1986 and institutional guidance on animal care. All experimental animals (18-20 g, male, CD-1 mice, Charles River, UK) were housed in groups of five with environmental enrichment, water and food *ad libitum* and their health monitored daily during acclimatization. The experimental design was based upon 3R-refined WHO-recommended protocols<sup>28,41</sup>, with animals randomized and observers being blinded to the experimental condition. The median lethal doses (venom LD<sub>50</sub>) used for *E. ocellatus* (Nigeria), *E. carinatus* (India), *B. asper* (Costa Rica), *D. russelii* (Sri Lanka) and *B. arietans* (Nigeria) venoms were previously determined<sup>25,41,44,45</sup>.

#### *Preclinical efficacy via a preincubation model of envenoming*

For our initial *in vivo* experiments, we used 2.5 × the intravenous LD<sub>50</sub> doses of *E. ocellatus* (45 µg), *E. carinatus* (47.5 µg), *B. asper* (47 µg), *D. russelii* (20 µg) and *B. arietans* (54 µg) venoms in a 3R-refined version of the WHO-recommended<sup>41</sup> antivenom ED<sub>50</sub> neutralization experiment<sup>25</sup>. Groups of five mice received experimental doses that consisted of either: (a) venom only (2.5 × LD<sub>50</sub> dose); (b) venom and solo drug (60 µg); (c) solo drug only (60 µg); (d) venom and a mix of two or three drugs (60 µg each); or (e) a mix of two or three drugs only (60 µg each). Drugs were dissolved in water, with the exception of varespladib, which



was prepared as a 5 mg/ml stock in DMSO (2.5% in the final reaction) due to solubility. All experimental doses were prepared to a volume of 200  $\mu$ l in PBS and incubated at 37 °C for 30 mins prior to their intravenous injection via the tail vein. Animals were monitored for 6 h, and euthanized via rising concentrations of CO<sub>2</sub> upon observation of previously defined humane endpoints that are predictors of lethality (e.g. seizure, pulmonary distress, paralysis, hemorrhage)<sup>28</sup>. Deaths, time of death, and survivors were recorded; where “deaths/time of death” actually represents the implementation of euthanasia based on defined humane endpoints.

#### *Preclinical efficacy via a ‘challenge then treat’ model of envenoming*

In these experiments, mice were challenged with venom intraperitoneally followed by delayed dosing of the marimastat and varespladib inhibitor mix 15 mins later, as previously described<sup>28</sup>. For *E. ocellatus*, *E. carinatus* and *B. arietans* venoms we challenged mice with 5  $\times$  iv LD<sub>50</sub> doses (90  $\mu$ g, 95  $\mu$ g and 108  $\mu$ g, respectively), while higher doses were required to cause lethality with *B. asper* (303  $\mu$ g,  $\sim$ 16  $\times$  iv. LD<sub>50</sub>s) and *D. russelii* (13  $\times$  iv. LD<sub>50</sub>, 105  $\mu$ g) venoms in this model. All intraperitoneal venom doses consisted a final volume of 100  $\mu$ l in PBS. Drug doses were scaled up from 60  $\mu$ g/mouse in the preincubation experiments outlined above to 120  $\mu$ g/mouse here, in line with the (at least) doubling of the venom challenge dose from 2.5  $\times$  LD<sub>50</sub> to 5  $\times$  LD<sub>50</sub> (i.e. for *E. ocellatus*, *E. carinatus* and *B. arietans*). All inhibitor doses were delivered intraperitoneally 15 mins after venom injection and consisted of 200  $\mu$ l final volumes. The experimental groups comprised five mice receiving: (a) venom only + 200  $\mu$ l PBS (15 min later); (b) venom + drug mix (120  $\mu$ g marimastat and 120  $\mu$ g varespladib, 15 min later); and (c) sham (100  $\mu$ l PBS) + drug mix (15 min later). Experimental animals were monitored for 24 h, with humane end points for euthanasia, and data recording, performed as described above.

*Quantification of thrombin-antithrombin levels and thrombomodulin levels by ELISA*

For all experimental animals described above, blood samples were collected via cardiac puncture immediately post-euthanasia. Plasma was separated by centrifugation at 400 x g for 10 min and stored at -80 °C. We assessed the levels of thrombin-antithrombin complexes (TAT) and soluble thrombomodulin using mouse ELISA Kits (ab137994 and ab209880, Abcam), following the manufacturer's protocol. All available plasma samples (some were unobtainable via cardiac puncture due to extensive internal hemorrhage) were assessed if the time of death within the group varied, whereas three samples were randomly chosen if the time of death was the same (e.g. either very rapid death within 2 minutes, or survival until the end of the experiment [360 min or 24 h]). The resulting data was plotted as the median of duplicate measurements for each animal and is presented with standard deviations (SDs).

## References

1. Gutiérrez, J. M. *et al.* Snakebite envenoming. *Nat. Rev. Dis. Prim.* **3**, 17063 (2017).
2. Harrison, R. A., Casewell, N. R., Ainsworth, S. A. & Lalloo, D. G. The time is now: a call for action to translate recent momentum on tackling tropical snakebite into sustained benefit for victims. *Trans. R. Soc. Trop. Med. Hyg.* **113**, 835–838 (2019).
3. Williams, D. J. *et al.* Strategy for a globally coordinated response to a priority neglected tropical disease: Snakebite envenoming. *PLoS Negl. Trop. Dis.* **13**, e0007059 (2019).
4. Casewell, N. R. *et al.* Medically important differences in snake venom composition are dictated by distinct postgenomic mechanisms. *Proc. Natl. Acad. Sci. U. S. A.* **111**, 9205–10 (2014).
5. Tasoulis, T. & Isbister, G. K. A review and database of snake venom proteomes. *Toxins (Basel)*. **9**, 290 (2017).
6. Williams, D. J. *et al.* Ending the drought: New strategies for improving the flow of affordable, effective antivenoms in Asia and Africa. *J. Proteomics* **74**, 1735–1767 (2011).
7. Arnold, C. Vipers, mambas and taipans: the escalating health crisis over snakebites. *Nature* **537**, 26–28 (2016).
8. Gutiérrez, J. M. Global availability of antivenoms: The relevance of public manufacturing laboratories. *Toxins* **11**, 5 (2019).
9. Casewell, N. R. *et al.* Pre-clinical assays predict pan-African *Echis* viper efficacy for a species-specific antivenom. *PLoS Negl. Trop. Dis.* **4**, e851 (2010).
10. de Silva, H. A. *et al.* Low-dose adrenaline, promethazine, and hydrocortisone in the prevention of acute adverse reactions to antivenom following snakebite: A randomised, double-blind, placebo-controlled trial. *PLoS Med.* **8**, e1000435 (2011).
11. Mohapatra, B. *et al.* Snakebite mortality in India: a nationally representative mortality survey. *PLoS Negl. Trop. Dis.* **5**, e1018 (2011).
12. Bulfone, T. C., Samuel, S. P., Bickler, P. E. & Lewin, M. R. Developing small molecule therapeutics for the initial and adjunctive treatment of snakebite. *J. Trop. Med.* **2018**, 1–14 (2018).
13. Knudsen, C. & Laustsen, A. H. Recent advances in next generation snakebite antivenoms. *Trop. Med. Infect. Dis.* **3**, 42 (2018).
14. Habib, A. G., Gebi, U. I. & Onyemelukwe, G. C. Snake bite in Nigeria. *Afr. J. Med. & Med. Sci.* **30**, 171–178 (2001).
15. Otero-Patiño, R. Epidemiological, clinical and therapeutic aspects of *Bothrops asper* bites. *Toxicon* **54**, 998–1011 (2009).
16. Kumar, K. G. S., Narayanan, S., Udayabhaskaran, V. & Thulaseedharan, N. K. Clinical and epidemiologic profile and predictors of outcome of poisonous snake bites – an analysis of 1,500 cases from a tertiary care center in Malabar, North Kerala, India. *Int. J. Gen. Med.* **11**, 209–216 (2018).

17. Slagboom, J., Kool, J., Harrison, R. A. & Casewell, N. R. Haemotoxic snake venoms: their functional activity, impact on snakebite victims and pharmaceutical promise. *Br. J. Haematol.* **177**, 947-959 (2017).
18. Gutiérrez, J. M. & Rucavado, A. Snake venom metalloproteinases: their role in the pathogenesis of local tissue damage. *Biochimie* **82**, 841–850 (2000).
19. Gutiérrez, J. M., Escalante, T., Rucavado, A. & Herrera, C. Hemorrhage caused by snake venom metalloproteinases: a journey of discovery and understanding. *Toxins (Basel)*. **8**, 93 (2016).
20. Ferraz, C. R. *et al.* Multifunctional toxins in snake venoms and therapeutic implications: from pain to hemorrhage and necrosis. *Front. Ecol. Evol.* **7**, 1–19 (2019).
21. Howes, J.-M., Theakston, R. D. G. & Laing, G. D. Neutralization of the haemorrhagic activities of viperine snake venoms and venom metalloproteinases using synthetic peptide inhibitors and chelators. *Toxicon* **49**, 734–739 (2007).
22. Lewin, M., Samuel, S., Merkel, J. & Bickler, P. Varespladib (LY315920) appears to be a potent, broad-spectrum, inhibitor of snake venom phospholipase A2 and a possible pre-referral treatment for envenomation. *Toxins (Basel)*. **8**, 248 (2016).
23. Arias, A. S., Rucavado, A. & Gutiérrez, J. M. Peptidomimetic hydroxamate metalloproteinase inhibitors abrogate local and systemic toxicity induced by *Echis ocellatus* (saw-scaled) snake venom. *Toxicon* **132**, 40–49 (2017).
24. Rucavado, A. *et al.* Inhibition of local hemorrhage and dermonecrosis induced by *Bothrops asper* snake venom: effectiveness of early in situ administration of the peptidomimetic metalloproteinase inhibitor batimastat and the chelating agent CaNa<sub>2</sub>EDTA. *Am. J. Trop. Med. Hyg.* **63**, 313–319 (2000).
25. Ainsworth, S. *et al.* The paraspecific neutralisation of snake venom induced coagulopathy by antivenoms. *Commun. Biol.* **1**, 34 (2018).
26. Lewin, M. *et al.* Delayed LY333013 (Oral) and LY315920 (Intravenous) reverse severe neurotoxicity and rescue juvenile pigs from lethal doses of *Micrurus fulvius* (Eastern coral snake) venom. *Toxins (Basel)*. **10**, 479 (2018).
27. Lewin, M. *et al.* Delayed oral LY333013 rescues mice from highly neurotoxic, lethal doses of Papuan taipan (*Oxyuranus scutellatus*) venom. *Toxins (Basel)*. **10**, 380 (2018).
28. Albuлесcu, L.-O. *et al.* Preclinical validation of a repurposed metal chelator as an early-intervention therapeutic for hemotoxic snakebite. *Sci. Trans. Med.* **12**, eaay8314 (2020).
29. Wang, Y. *et al.* Exploration of the inhibitory potential of varespladib for snakebite envenomation. *Molecules* **23**, 391 (2018).
30. Layfield, H. J. *et al.* Repurposing cancer drugs batimastat and marimastat to inhibit the activity of a group I metalloprotease from the venom of the Western diamondback rattlesnake, *Crotalus atrox*. *Toxins* **12**, 309 (2020).
31. Rowsell, S. *et al.* Crystal structure of human MMP9 in complex with a reverse hydroxamate inhibitor. *J. Mol. Biol.* **319**, 173–81 (2002).

32. Warrell, D. A. & Arnett, C. The importance of bites by the saw scaled or carpet viper (*Echis carinatus*): Epidemiological studies in Nigeria and a review of the world. *Acta Trop.* **33**, 307–341 (1976).
33. Warrell, D. Clinical Toxicology of Snakebite in Asia. in *Handbook of Clinical Toxicology of Animal Venoms and Poisons* (eds. White, J. & Meier, J.) pp. 534–594 (CRC Press, 1995).
34. Warrell, D. Clinical Toxicology of Snakebite in Africa and the Middle East/Arabian Peninsula. in *Handbook of Clinical Toxicology of Animal Venoms and Poisons* (eds. White, J. & Meier, J.) pp. 455–492 (CRC Press, 1995).
35. Still, K. *et al.* Multipurpose HTS Coagulation Analysis: Assay Development and Assessment of Coagulopathic Snake Venoms. *Toxins (Basel)*. **9**, 382 (2017).
36. Rogalski, A. *et al.* Differential procoagulant effects of saw-scaled viper (Serpentes: Viperidae: *Echis*) snake venoms on human plasma and the narrow taxonomic ranges of antivenom efficacies. *Toxicol. Lett.* **280**, 159–170 (2017).
37. Slagboom, J. *et al.* High throughput screening and identification of coagulopathic snake venom proteins and peptides using nanofractionation and proteomics approaches. *PLoS Negl. Trop. Dis.* **14**, e0007802 (2020).
38. Winer, A., Adams, S. & Mignatti, P. Matrix metalloproteinase inhibitors in cancer therapy: turning past failures into future successes. *Mol. Cancer Ther.* **17**, 1147–1155 (2018).
39. Kim, E. Y. *et al.* Low-dose nafamostat mesilate in hemodialysis patients at high bleeding risk. *Kidney Res. Clin. Pract.* **30**, 61–66 (2011).
40. Kim, H. S. *et al.* Cardiac arrest caused by nafamostat mesilate. *Kidney Res. Clin. Pract.* **35**, 187–189 (2016).
41. Theakston, R. D. & Reid, H. A. Development of simple standard assay procedures for the characterization of snake venom. *Bull. World Health Organ.* **61**, 949–56 (1983).
42. Harrison, R. A. *et al.* Preclinical antivenom-efficacy testing reveals potentially disturbing deficiencies of snakebite treatment capability in East Africa. *PLoS Negl. Trop. Dis.* **11**, e0005969 (2017).
43. WHO | WHO Guidelines for the Production, Control and Regulation of Snake Antivenom Immunoglobulins. *WHO* (2018).
44. Bolaños, R. Toxicity of Costa Rican snake venoms for the white mouse. *Am. J. Trop. Med. Hyg.* **21**, 360–363 (1972).
45. Villalta, M. *et al.* Development of a new polyspecific antivenom for snakebite envenoming in Sri Lanka: Analysis of its preclinical efficacy as compared to a currently available antivenom. *Toxicon* **122**, 152–159 (2016).
46. Mora-Obando, D. *et al.* Proteomic and functional profiling of the venom of *Bothrops ayerbei* from Cauca, Colombia, reveals striking interspecific variation with *Bothrops asper* venom. *J. Proteomics* **96**, 159–172 (2014).
47. Harrison, R. A. & Gutiérrez, J. M. Priority actions and progress to substantially and sustainably reduce the mortality, morbidity and socioeconomic burden of tropical

- snakebite. *Toxins (Basel)*. **8**, 351 (2016).
48. de la Rosa, G. *et al.* Horse immunization with short-chain consensus  $\alpha$ -neurotoxin generates antibodies against broad spectrum of elapid venomous species. *Nat. Commun.* **10**, 3642 (2019).
  49. Kini, R. M., Sidhu, S. S. & Laustsen, A. H. Biosynthetic oligoclonal antivenom (BOA) for snakebite and next-generation treatments for snakebite victims. *Toxins (Basel)*. **10**, 534 (2018).
  50. Laustsen, A. H. *et al.* In vivo neutralization of dendrotoxin-mediated neurotoxicity of black mamba venom by oligoclonal human IgG antibodies. *Nat. Commun.* **9**, 3928 (2018).
  51. Peterson, J. The importance of estimating the therapeutic index in the development of matrix metalloproteinase inhibitors. *Cardiovasc. Res.* **69**, 677–687 (2006).
  52. Millar, A. W. *et al.* Results of single and repeat dose studies of the oral matrix metalloproteinase inhibitor marimastat in healthy male volunteers. *Br. J. Clin. Pharmacol.* **45**, 21–6 (1998).
  53. Rosemurgy, A. *et al.* Marimastat in patients with advanced pancreatic cancer: a dose-finding study. *Am. J. Clin. Oncol.* **22**, 247–52 (1999).
  54. Nair, A. & Jacob, S. A simple practice guide for dose conversion between animals and human. *J. Basic Clin. Pharm.* **7**, 27 (2016).
  55. Varespladib. *Am. J. Cardiovasc. Drugs* **11**, 137–143 (2011).
  56. Rosenson, R. S. *et al.* Effects of varespladib methyl on biomarkers and major cardiovascular events in acute coronary syndrome patients. *J. Am. Coll. Cardiol.* **56**, 1079–1088 (2010).
  57. Abraham, E. *et al.* Efficacy and safety of LY315920Na/S-5920, a selective inhibitor of 14-kDa group IIA secretory phospholipase A2, in patients with suspected sepsis and organ failure. *Crit. Care Med.* **31**, 718–728 (2003).
  58. Nicholls, S. J. *et al.* Varespladib and cardiovascular events in patients with an acute coronary syndrome: The VISTA-16 randomized clinical trial. *JAMA - J. Am. Med. Assoc.* **311**, 252–262 (2014).
  59. Gutiérrez, J. M., Lewin, M. R., Williams, D. J. & Lomonte, B. Varespladib (LY315920) and methyl varespladib (LY333013) abrogate or delay lethality induced by presynaptically acting neurotoxic snake venoms. *Toxins (Basel)*. **12**, 131 (2020).
  60. Ohtake, Y. *et al.* Nafamostat mesylate as anticoagulant in continuous hemofiltration and continuous hemodiafiltration. *Contrib. Nephrol.* **93**, 215–217 (1991).
  61. Maiorino, R. M., Xu, Z. F. & Aposhian, H. V. Determination and metabolism of dithiol chelating agents. XVII. In humans, sodium 2,3-dimercapto-1-propanesulfonate is bound to plasma albumin via mixed disulfide formation and is found in the urine as cyclic polymeric disulfides. *J. Pharmacol. Exp. Ther.* **277**, 375-84 (1996).
  62. Kosnett, M. J. The role of chelation in the treatment of arsenic and mercury poisoning. *J. Med. Toxicol.* **9**, 347–354 (2013).
  63. Wagstaff, S. C., Sanz, L., Juárez, P., Harrison, R. A. & Calvete, J. J. Combined snake

- venomics and venom gland transcriptomic analysis of the ocellated carpet viper, *Echis ocellatus*. *J. Proteomics* **71**, 609–623 (2009).
64. Tan, N. H. *et al.* Functional venomics of the Sri Lankan Russell's viper (*Daboia russelii*) and its toxinological correlations. *J. Proteomics* **128**, 403–423 (2015).
  65. Pla, D. *et al.* Phylovenomics of *Daboia russelii* across the Indian subcontinent. Bioactivities and comparative in vivo neutralization and in vitro third-generation antivenomics of antivenoms against venoms from India, Bangladesh and Sri Lanka. *J. Proteomics* **207**, 103443 (2019).
  66. Bradley, J. D. *et al.* A randomized, double-blinded, placebo-controlled clinical trial of LY333013, a selective inhibitor of group II secretory phospholipase A2, in the treatment of rheumatoid arthritis. *J. Rheumatol.* **32**, 417–423 (2005).
  67. Sevenet, P. O. & Depasse, F. Clot waveform analysis: Where do we stand in 2017? *Int. J. Lab. Hematol.* **39**, 561–568 (2017).
  68. Patra, A., Kalita, B., Chanda, A. & Mukherjee, A. K. Proteomics and antivenomics of *Echis carinatus carinatus* venom: Correlation with pharmacological properties and pathophysiology of envenomation. *Sci. Rep.* **7**, 1–17 (2017).
  69. Alape-Girón, A. *et al.* Studies on the venom proteome of *Bothrops asper*: perspectives and applications. *Toxicon* **54**, 938–948 (2009).
  70. Calvete, J. J., Escolano, J. & Sanz, L. Snake venomics of *Bitis* species reveals large intragenus venom toxin composition variation: application to taxonomy of congeneric taxa. *J. Proteome Res.* **6**, 2732–2745 (2007).

## Acknowledgements

We thank Paul Rowley for maintaining the snakes at the LSTM Herpetarium and for routine venom extractions, Mark Wilkinson for expertise relating to venom fractionation, and Joshua Longbottom for assistance generating the snake distribution maps. This study was supported by: (i) a Sir Henry Dale Fellowship to N.R.C. (200517/Z/16/Z) jointly funded by the Wellcome Trust and Royal Society, (ii) UK Medical Research Council (MRC) funded Research Grant (MR/S00016X/1) and Confidence in Concept Award (CiC19017) to R.A.H. and N.R.C., and (iii) a Wellcome Trust funded Biomedical Vacation Scholarship (207075/Z/17/) to R.S.

**Author contributions:** L-O.A., J.K. and N.R.C. conceptualized the project; L-O.A., C.A.D., R.S. and K.E.B. performed *in vitro* experiments; C.X. and J.K. performed venom nanofractionation experiments; S.A., J.A. E.C., C.A.D., R.A.H. and N.R.C. performed *in vivo* experiments. L-O.A. performed data analyses. L-O.A. and N.R.C. wrote the manuscript with input and approval from all other authors.

**Competing interests:** The authors declare no competing interests

**Materials and correspondence:** Nicholas R. Casewell: [Nicholas.casewell@lstmed.ac.uk](mailto:Nicholas.casewell@lstmed.ac.uk)



## Figures and Legends

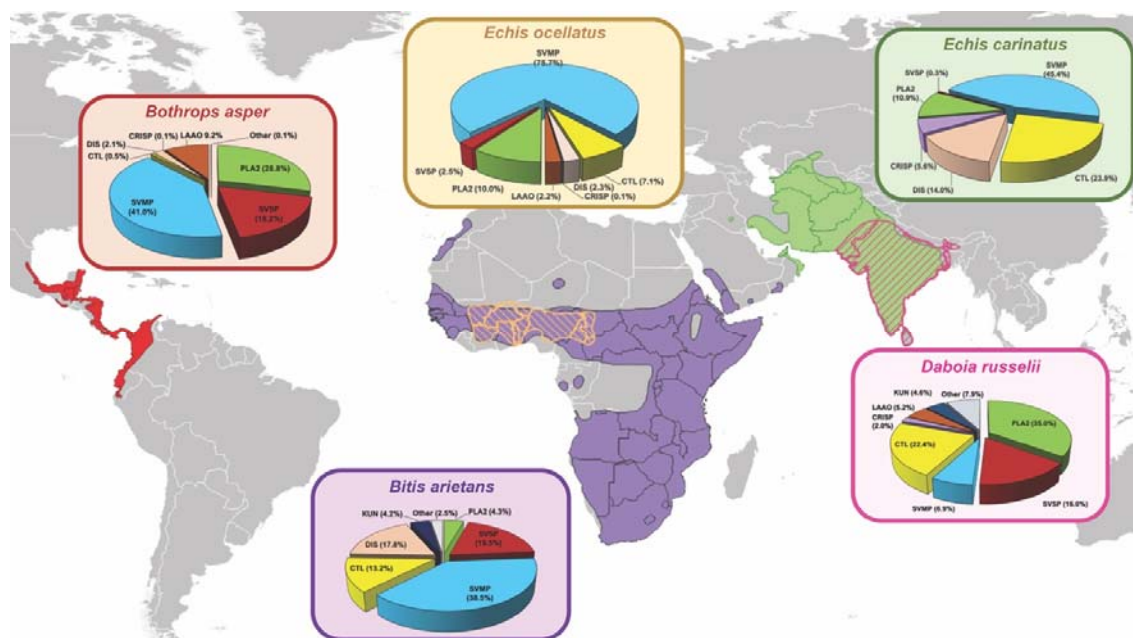

**Fig. 1. The geographical distributions and varying proteomic venom compositions of the medically important viper species used in this study.** The previously defined venom proteomes of *Echis ocellatus* (Nigeria)<sup>63</sup>, *Echis carinatus* (India)<sup>68</sup>, *Bothrops asper* (Costa Rica, “Atlantic”)<sup>69</sup>, *Bitis arietans* (Nigeria)<sup>70</sup> and *Daboia russelii* (Sri Lanka)<sup>64</sup> are presented in pie charts. Toxin family key: SVMP, snake venom metalloproteinase; SVSP, snake venom serine protease; PLA<sub>2</sub>, phospholipase A<sub>2</sub>; CTL, C-type lectin; LAAO, L-amino acid oxidase; DIS, disintegrin; CRISP, Cysteine-rich secretory protein; KUN, Kunitz-type serine protease inhibitor. Geographical species distributions were drawn using QGIS software based on data downloaded from the World Health Organization Venomous Snake Distribution database and the IUCN Red List of Threatened Species database.

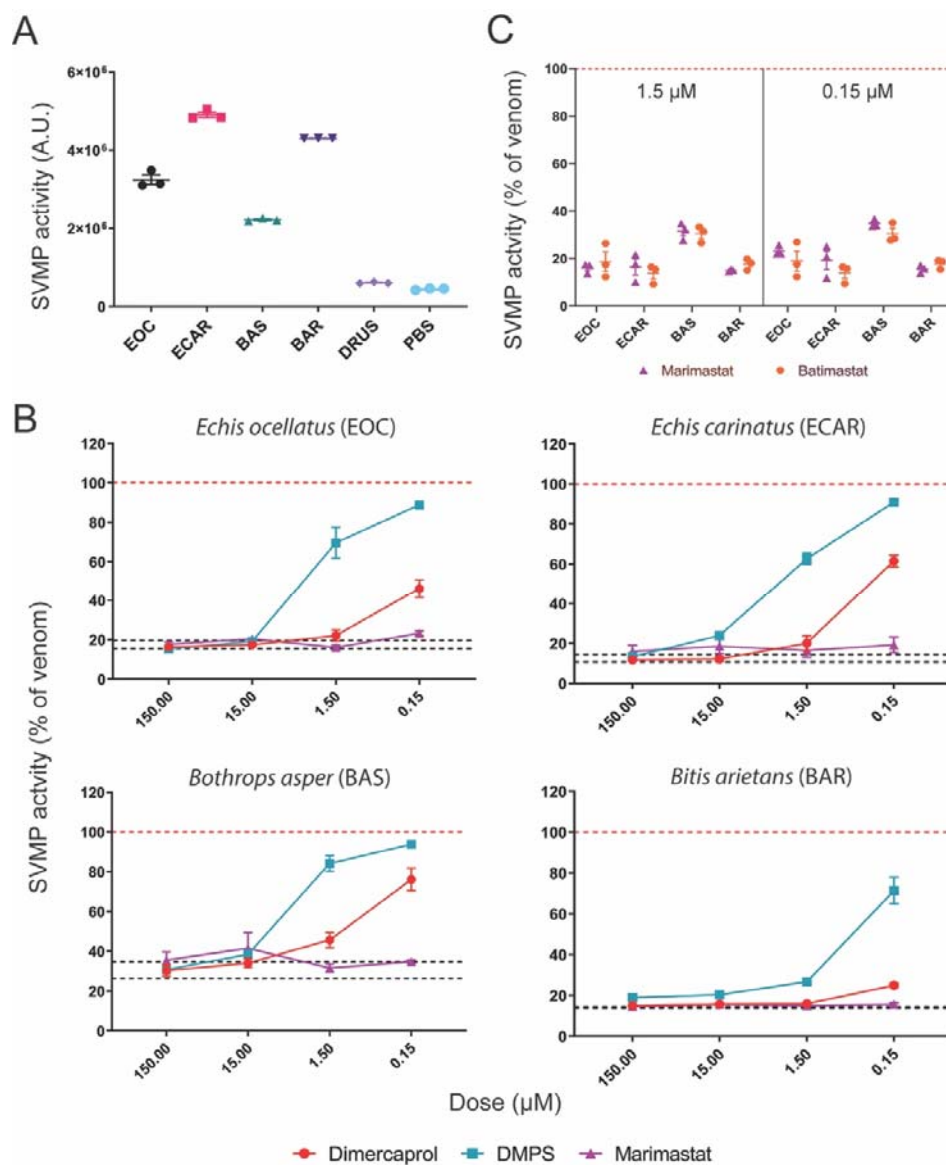

**Fig. 2. Small molecule toxin inhibitors inhibit the *in vitro* SVMP activities of several geographically distinct viper venoms.** (A) SVMP activities of the five viper venoms quantified by fluorogenic assay. The data presented represent mean measurements and SEMs of area under the curves of fluorescent arbitrary units taken from three independent experimental runs. EOC, *E. ocellatus*; ECAR, *E. carinatus*; BAS, *Bothrops asper*; BAR, *Bitis arietans*; DRUS, *Daboia russelii*. (B) The effectiveness of metal chelators and peptidomimetic hydroxamate inhibitors at inhibiting the SVMP activity of the various viper venoms. Drug concentrations from 150 µM to 150 nM (highest to lowest dose tested) are

presented. The data is expressed as percentage of the venom-only sample (100%, dashed red line). The negative control is presented as an interval (dashed black lines) and represents the values recorded in the PBS-only samples (expressed as percentage of venom activity), where the highest and the lowest values in each set of independent experiments are depicted. Inhibitors are color-coded (dimercaprol, red; DMPS, turquoise; marimastat, purple). (C) Comparison of SVMP inhibition by marimastat (purple) and batimastat (orange) at two concentrations (1.5  $\mu$ M, left; 0.15  $\mu$ M, right), expressed as the percentage of the venom-only sample (100%, dashed red line). All data represent triplicate independent repeats with SEMs, where each technical repeat represents the mean of  $n \geq 2$  technical replicates.

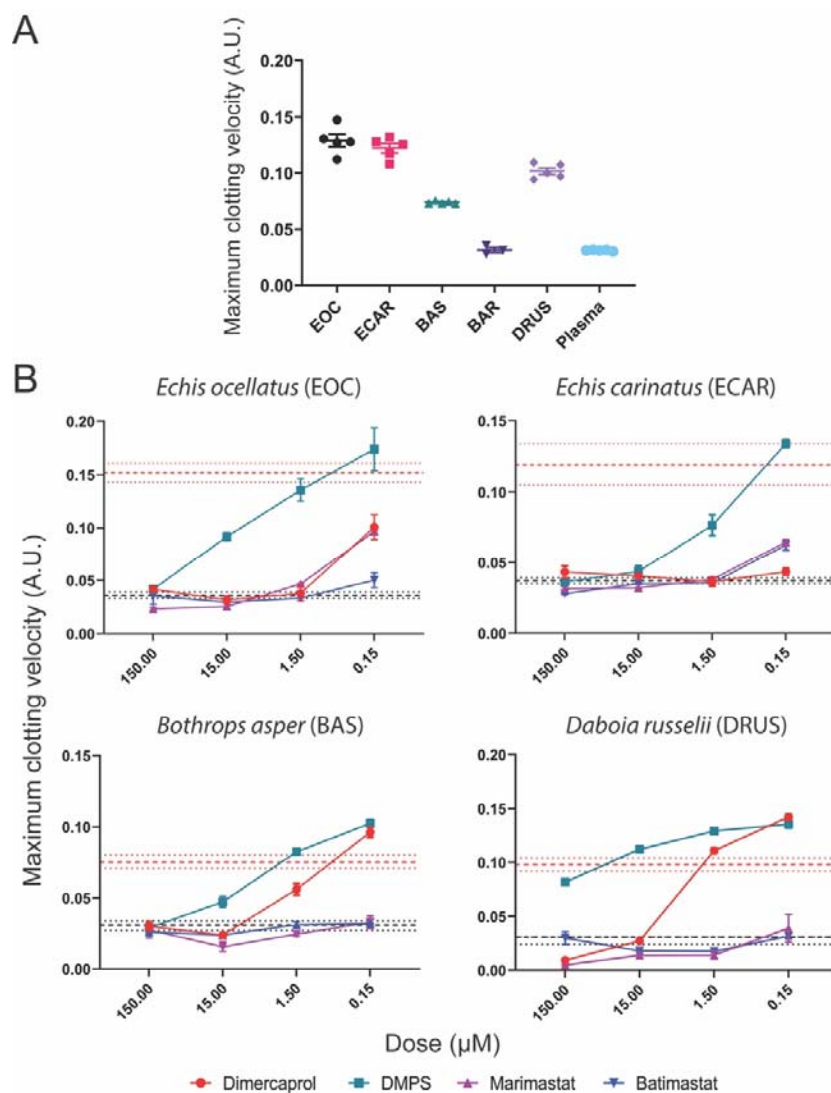

**Fig. 3. SVMP-inhibitors neutralize the *in vitro* procoagulant activities of several geographically distinct viper venoms. (A)** The coagulopathic activities of the viper venoms, showing that all, except *B. arietans* (BAR), exhibit procoagulant effects by increasing the clotting velocity in comparison with the normal plasma control. The data presented represents the maximum clotting velocity, calculated as the maximum of the first derivative of each clotting curve, from triplicate independent repeat experiments with SEMs, where each technical repeat represents the mean of  $n \geq 2$  technical replicates. EOC, *E. ocellatus*; ECAR, *E. carinatus*; BAS, *Bothrops asper*; BAR, *Bitis arietans*; DRUS, *Daboia russelii*. **(B)** Neutralization of procoagulant venom activity by four SVMP-inhibitors across four drug

concentrations (150  $\mu$ M to 150 nM). The data is expressed as the maximum clotting velocity at each dose. The negative (PBS) and positive (venom-only) controls are presented as intervals (dashed black and red lines, respectively), with the latter representing the mean maximum clotting velocity in these samples  $\pm$  SEM. Inhibitors are color-coded (dimercaprol, red; DMPS, turquoise; marimastat, purple; batimastat, blue). The data represent triplicate independent repeats with SEMs, where each technical repeat represents the mean of  $n \geq 2$  technical replicates. Note the different y-axis scales.

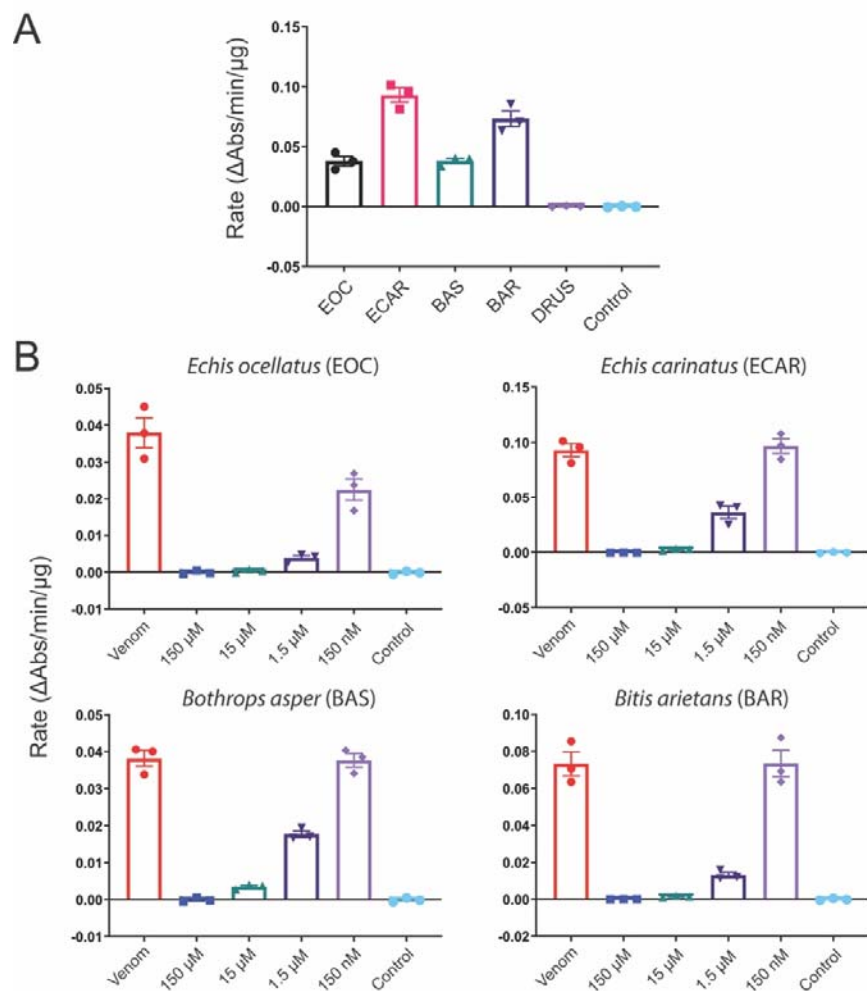

**Fig. 4. Nafamostat inhibits the *in vitro* serine protease activities of several geographically distinct viper venoms.** (A) The serine protease (SVSP) activity of five viper venoms expressed as the rate ( $\Delta$ Abs/time/ $\mu$ g venom) of substrate consumption determined by kinetic chromogenic assay. EOC, *E. ocellatus*; ECAR, *E. carinatus*; BAS, *Bothrops asper*; BAR, *Bitis arietans*; DRUS, *Daboia russelii*. (B) Neutralization of SVSP venom activity by the serine protease-inhibitor nafamostat. The data is expressed as rates ( $\Delta$ Abs/time/ $\mu$ g venom) and represents triplicate independent repeats with SEMs, where each technical repeat represents the mean of  $n \geq 2$  technical replicates. Venom only activity (venom) is displayed alongside venom incubated with decreasing molarities of nafamostat (150  $\mu$ M to 150 nM). Note the different y-axis scales.

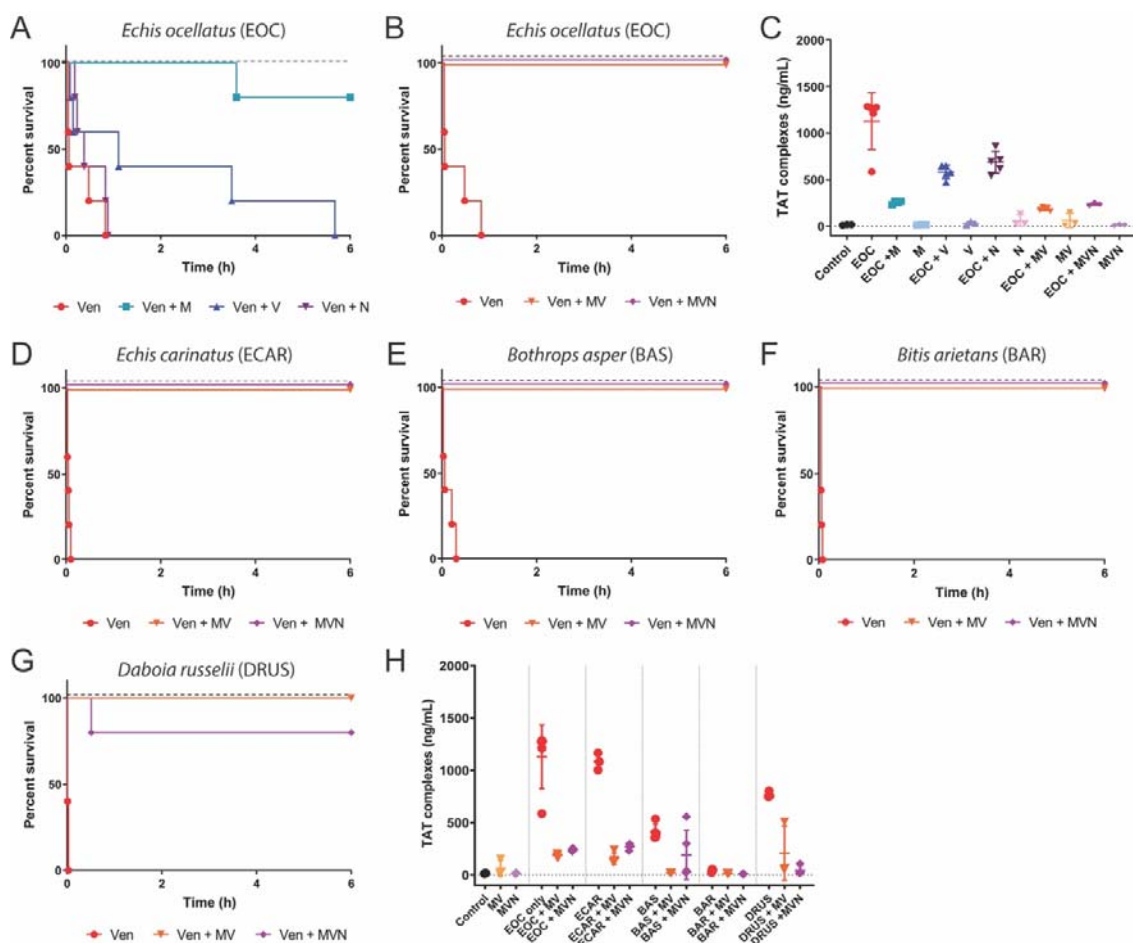

**Fig. 5. Combinations of small molecule toxin inhibitors broadly protect against venom lethality in an *in vivo* ‘preincubation’ model of snake envenoming.** Kaplan-Meier survival graphs for experimental animals (n=5) receiving venom (Ven) preincubated (30 mins at 37 °C) with different small molecule inhibitors or inhibitor mixes via the intravenous route and monitored for 6 h. Drug-only controls are presented as black dashed lines at the top of each graph (none of the drugs exhibited any observable toxicity at the given doses). **(A)** Survival of mice receiving 45 µg of *E. ocellatus* venom ( $2.5 \times LD_{50}$  dose) with and without 60 µg of marimastat or varespladib or nafamostat. **(B)** Survival of mice receiving 45 µg of *E. ocellatus* venom ( $2.5 \times LD_{50}$  dose) with and without a dual combination mixture of marimastat and varespladib (MV, 60 µg each) or a triple combination mixture of marimastat, varespladib and nafamostat (MVN, 60 µg each). **(C)** Quantified thrombin-antithrombin (TAT) levels in the

envenomed animals from (A) and (B). Where the time of death was the same within experimental groups (e.g. early deaths or complete survival) TAT levels were quantified for n=3, and where times of death varied, n=5. The data displayed represents means of the duplicate technical repeats plus SDs. (D-G) Kaplan-Meier survival graphs for experimental animals (n=5) receiving inhibitor mixes (MV or MVN) preincubated with  $2.5 \times LD_{50}$  dose of *E. carinatus* (47.5µg, D), *B. asper* (47 µg, E), *B. arietans* (54 µg, F) or *D. russelii* (20 µg, G) venom. (H) Quantified TAT levels in the envenomed animals from (D-G), with data presented as described for (C).



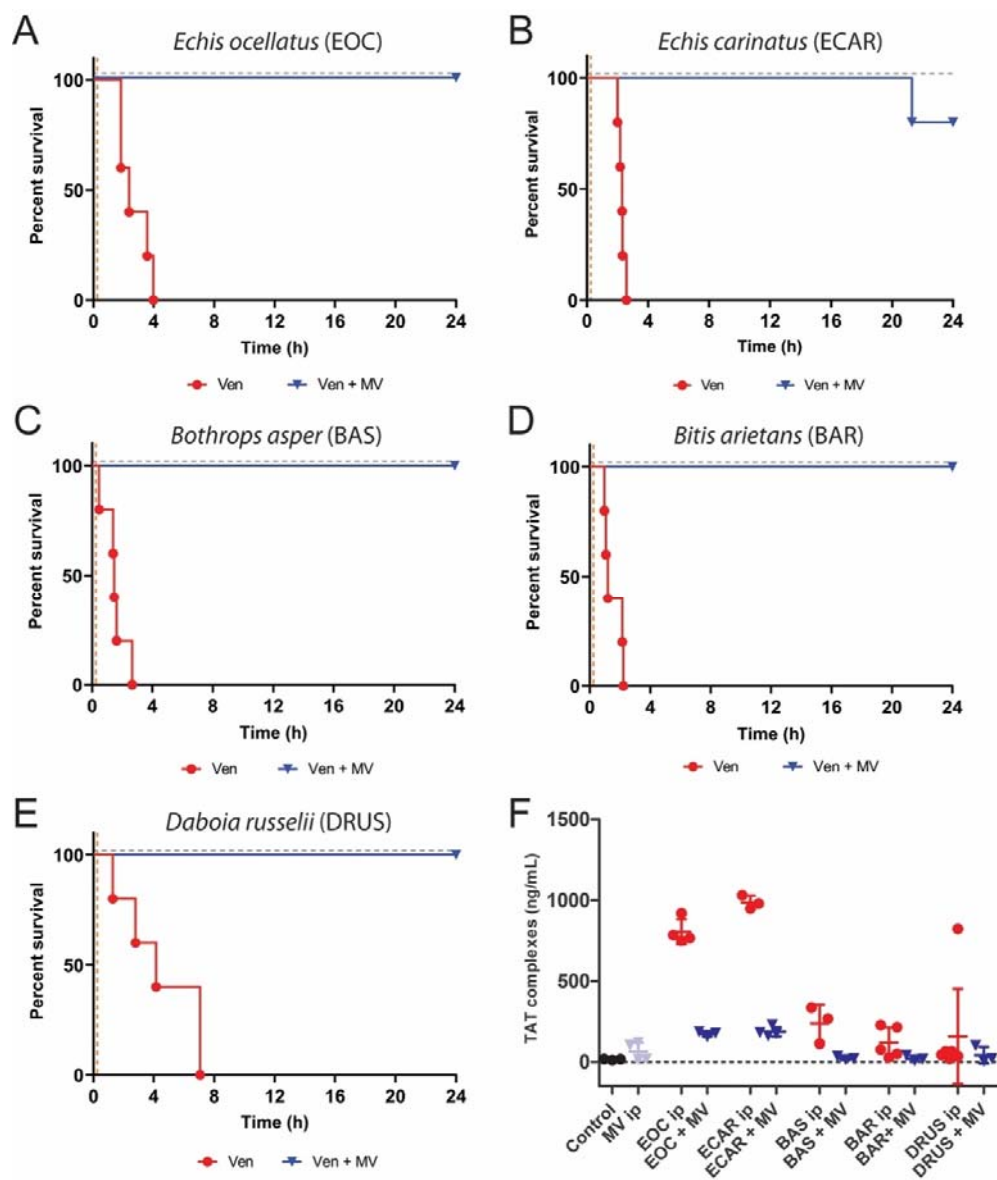

**Fig. 6. The inhibitor combination of marimastat and varespladib (MV) provides broad preclinical efficacy against venom lethality in an *in vivo* ‘challenge then treat’ model of envenoming.** Kaplan-Meier survival graphs for experimental animals (n=5) receiving venom (Ven), followed by delayed drug treatment (15 mins later) with a dual combination of marimastat and varespladib. Both venom and treatment were delivered via the intraperitoneal route, and the end of the experiment was at 24 h. Survival of mice receiving: (A) *E. ocellatus* (90  $\mu$ g, 5  $\times$  iv LD<sub>50</sub>), (B) *E. carinatus* (95  $\mu$ g, 5  $\times$  iv LD<sub>50</sub>), (C) *B. asper* (303  $\mu$ g, 3  $\times$  ip

LD<sub>50</sub>), **(D)** *B. arietans* (108 µg, 5 × iv LD<sub>50</sub>) and **(E)** *D. russelii* (105 µg, 13 × iv LD<sub>50</sub>) venom, with and without the inhibitor mix (120 µg of each drug) 15 mins later. The drug-only control is presented as a black dashed line at the top of each graph (no toxicity was observed at the given dose). **(F)** Quantified thrombin-antithrombin (TAT) levels in the envenomed animals from **(A-E)**. Where the time of death was the same within experimental groups (e.g. early deaths or complete survival) TAT levels were quantified for n=3, and where times of death varied, n=5. The data displayed represents means of the duplicate technical repeats plus SDs.
